# Supplementary material for: Identification and Characterization of FGF2-Dependent mRNA: microRNA Networks During Lens Fiber Cell Differentiation
Source: PubMed Central journal article supplement (PMC3852386; doi:10.1534/g3.113.008698), 2013-10-18
Supplement: supp_g3.113.008698_008698SI.pdf [file supp_g3.113.008698_008698SI.pdf]

## Identification and characterization of FGF2-dependent mRNA:miRNA networks during lens fiber cell differentiation

Louise Wolf<sup>1,2</sup>, Chun S. Gao<sup>3</sup>, Karen Gueta<sup>4</sup>, Qing Xie<sup>1,2</sup>, Tiphaine Chevallier<sup>2,5</sup>, Nikhil R. Podduturi<sup>6,7</sup>, Jian Sun<sup>2</sup>, Ivan Conte<sup>8</sup>, Peggy S. Zelenka<sup>3</sup>, Ruth Ashery-Padan<sup>4</sup>, Jiri Zavadil<sup>6,9,\*</sup>, Ales Cvekl<sup>1,2,\*</sup>

The Departments of Genetics<sup>1</sup> and Ophthalmology and Visual Sciences<sup>2</sup>, Albert Einstein College of Medicine, Bronx, NY 10461, USA; Laboratory of Molecular and Developmental Biology<sup>3</sup>, National Eye Institute (NEI), Bethesda, MD 20892, USA; <sup>4</sup>Sackler School of Medicine and Sagol School of Neuroscience, Tel-Aviv University, 69978 Ramat Aviv, Tel Aviv, Israel; Department of Pathology<sup>6</sup> and New York University Center for Health Informatics and Bioinformatics, New York University Langone Medical Center, New York, NY 10000, USA; Telethon Institute of Genetics and Medicine<sup>8</sup>, Via Pietro Castellino 111, I-80131 Naples, Italy

<sup>5</sup>Current address: Institut Cochin, INSERM U1016, Université Paris Descartes, 22 rue Méchain, F-75014 Paris, France.

<sup>7</sup>Current address: The ENCODE Center, Stanford University, Stanford, CA 94305.

<sup>9</sup>Current address: Mechanisms of Carcinogenesis Section, International Agency for Research on Cancer, 69372 Lyon Cedex 08, France.

\*Corresponding authors: Ales Cvekl, E-mail: [ales.cvekl@einstein.yu.edu](mailto:ales.cvekl@einstein.yu.edu), and Jiri Zavadil, e-mail: [ZavadilJ@iarc.fr](mailto:ZavadilJ@iarc.fr)

DOI: 10.1534/g3.113.008698

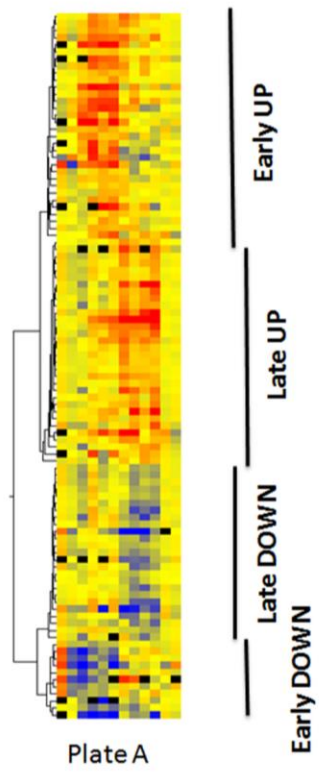

| microRNA profile | Regulated (FC > 1.25; 2 time points) |
|------------------|--------------------------------------|
| “Early” UP       | 50                                   |
| “Early” DOWN     | 16                                   |
| “Late” UP        | 36                                   |
| “Late” Down      | 29                                   |

**Figure S1** Self organizing maps on duplicate temporal profiles to identify main miRNAs expression profiles.

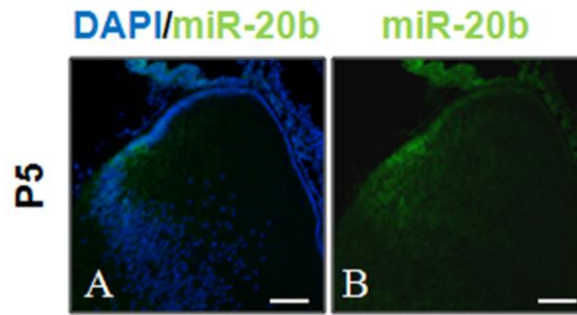

**Figure S2** ISH miR-20b. At postnatal day P5, expression of miR-20b (A-B) is detected in the migrating lens cells. Scale bar is 100  $\mu$ m.

**Files S1-S4 and Table S1**

Available for download at <http://www.g3journal.org/lookup/suppl/doi:10.1534/g3.113.008698/-/DC1>

**File S1** Two .xls files, inversely correlated genes.

**File S2** List of genes identified by GO and KEGG.

**File S3** Two .xls files, connectivity and ranking.

**File S4** Expression analysis of Bmp2, Bmp4, Bmp7, Id1, Id2, Id3, Fosl1, Fosl2, c-Fos, Ets1, Ets2, Elf1 and Etv1/ER81.

**Table S1** Expression data on 131 microRNAs modulated by FGF2 in rat lens explants.
