# Supplementary material for: Identification and Characterization of FGF2-Dependent mRNA: microRNA Networks During Lens Fiber Cell Differentiation
Source: PubMed Central journal article supplement (PMC3852386; doi:10.1534/g3.113.008698), 2013-10-18
Supplement: supp_g3.113.008698_FigureS1.pdf [file supp_g3.113.008698_FigureS1.pdf]

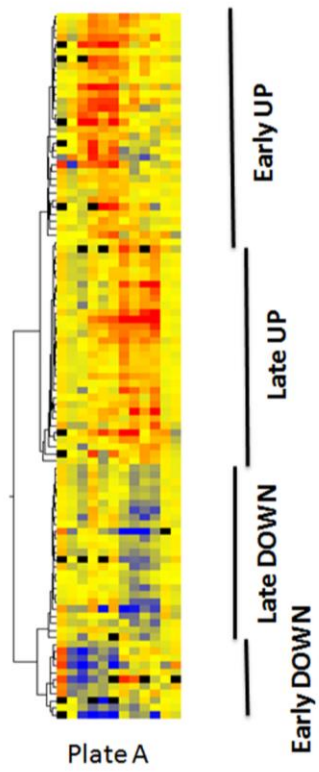

| microRNA profile | Regulated (FC > 1.25; 2 time points) |
|------------------|--------------------------------------|
| “Early” UP       | 50                                   |
| “Early” DOWN     | 16                                   |
| “Late” UP        | 36                                   |
| “Late” Down      | 29                                   |

**Figure S1** Self organizing maps on duplicate temporal profiles to identify main miRNAs expression profiles.
