# Supplementary material for: Identification and Characterization of FGF2-Dependent mRNA: microRNA Networks During Lens Fiber Cell Differentiation
Source: PubMed Central journal article supplement (PMC3852386; doi:10.1534/g3.113.008698), 2013-10-18
Supplement: supp_g3.113.008698_FigureS2.pdf [file supp_g3.113.008698_FigureS2.pdf]

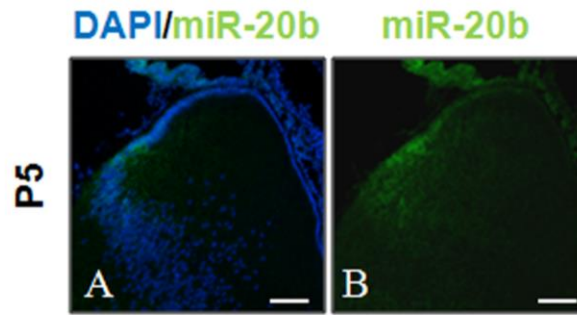

**Figure S2** ISH miR-20b. At postnatal day P5, expression of miR-20b (A-B) is detected in the migrating lens cells. Scale bar is 100  $\mu$ m.
